# Supplementary material for: A UV-visible-NIR active smart photocatalytic system based on NaYbF4:Tm3+ upconverting particles and Ag3PO4/H2O2 for photocatalytic processes under light on/light off conditions
Source: Royal Society of Chemistry journal article supplement (doi:10.1039/d1ma01028j), 2021-12-24
Supplement: d1ma01028j1.pdf [file d1ma01028j1.pdf]

## Supplementary Information

### UV-visible-NIR active smart photocatalytic system based on $\text{NaYbF}_4\text{:Tm}^{3+}$ upconverting particles and $\text{Ag}_3\text{PO}_4/\text{H}_2\text{O}_2$ for photocatalytic processes under both light on/light off conditions

York E. Serge-Correales<sup>a</sup>, Sajjad Ullah<sup>b,\*</sup>, Elias P. Ferreira-Neto<sup>a</sup>, Hernan D. Rojas-Mantilla<sup>a</sup>, Chanchal Hazra<sup>a</sup>, Sidney J.L. Ribeiro<sup>a,\*</sup>

<sup>a</sup> Institute of Chemistry, São Paulo State University (UNESP), 14800-060, Araraquara-SP, Brazil

<sup>b</sup> Institute of Chemical Sciences, University of Peshawar, PO Box 25120, Peshawar, Pakistan

\* Corresponding authors: S.J.L.R ([sidney.jl.ribeiro@unesp.br](mailto:sidney.jl.ribeiro@unesp.br)) and S.U ([sajjadullah@uop.edu.pk](mailto:sajjadullah@uop.edu.pk))

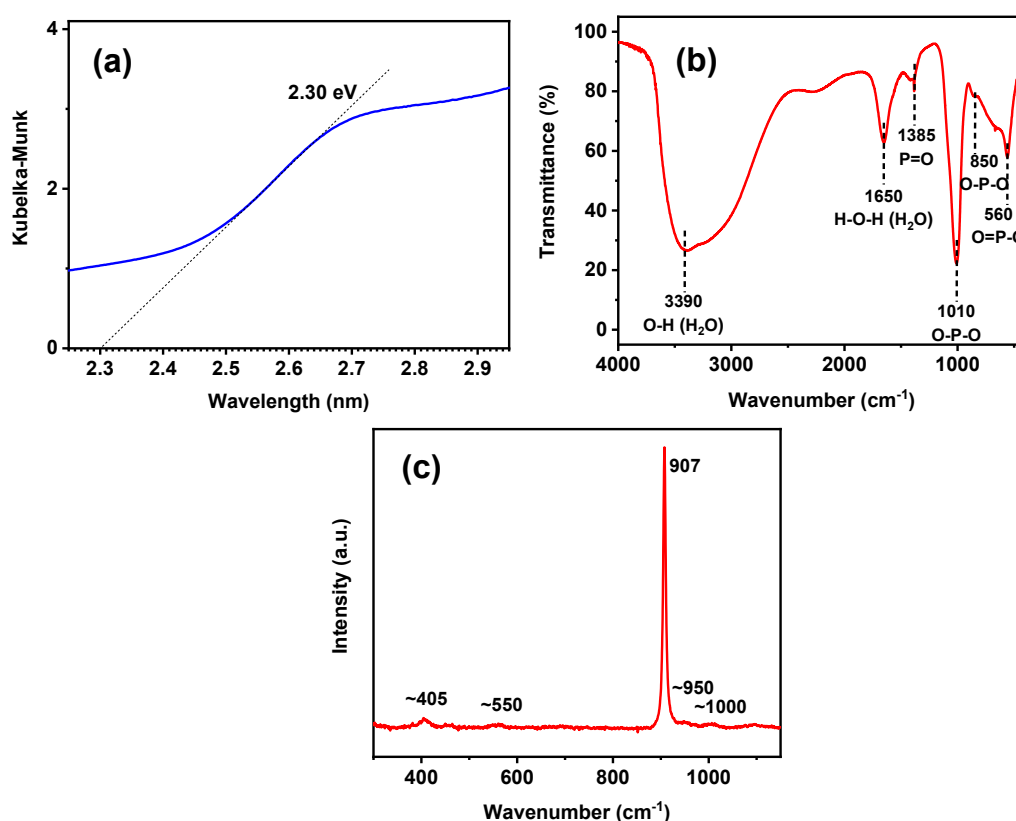

Figure S1. (a) Kubelka-Munk transformed reflectance spectrum and estimated optical bandgap, (b) FTIR spectrum and (c) Raman spectrum of  $\text{Ag}_3\text{PO}_4$  photocatalyst.

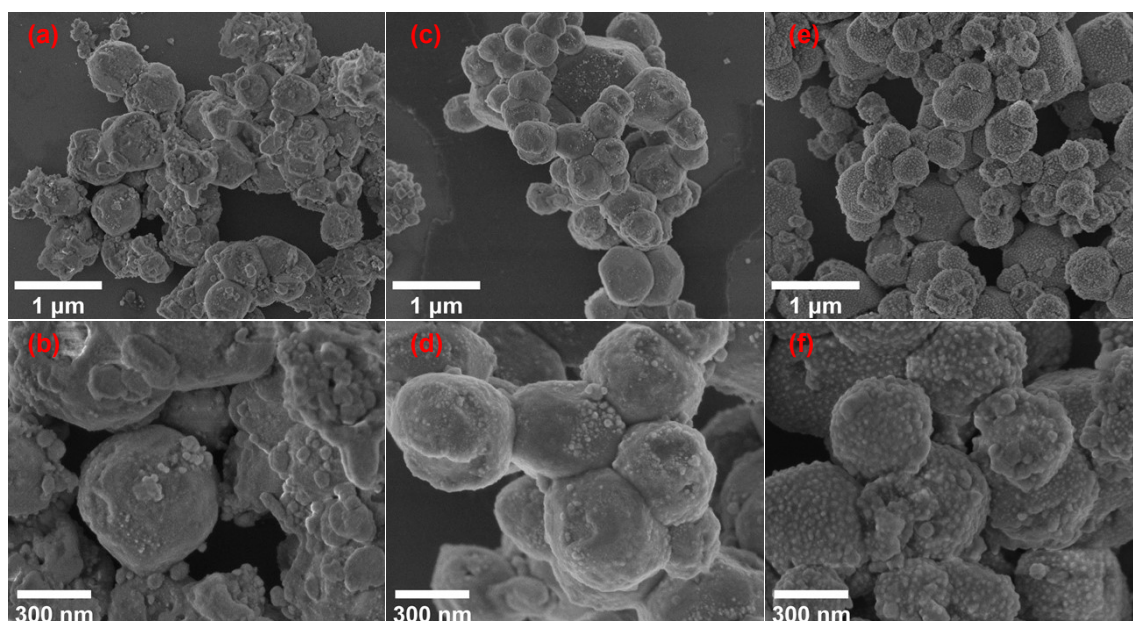

Figure S2. SEM images of  $\text{Ag}_3\text{PO}_4$  photocatalyst after four photocatalytic cycles (a, b) in the absence of  $\text{H}_2\text{O}_2$ , (c, d) in the presence of  $6.6 \text{ mmol L}^{-1}$  of  $\text{H}_2\text{O}_2$  and (e,f) regenerated photocatalyst. Figs. S2a,b show that in the absence of  $\text{H}_2\text{O}_2$ , the surface of the  $\text{Ag}_3\text{PO}_4$  particles was severely deformed, while the presence of  $6.6 \text{ mmol L}^{-1}$  of  $\text{H}_2\text{O}_2$  during the degradation experiments apparently prevented the damage to the photocatalyst surface (Figs. S2c,d). Additionally, the regenerated  $\text{Ag}_3\text{PO}_4$  photocatalysts presented small particles on the surface, which might have formed from the oxidation of the photodeposited small Ag nanoparticles back to  $\text{Ag}^+$  ( $\text{Ag}_3\text{PO}_4$ ) by  $\text{H}_2\text{O}_2$  employed as an oxidizing agent during the regeneration process.

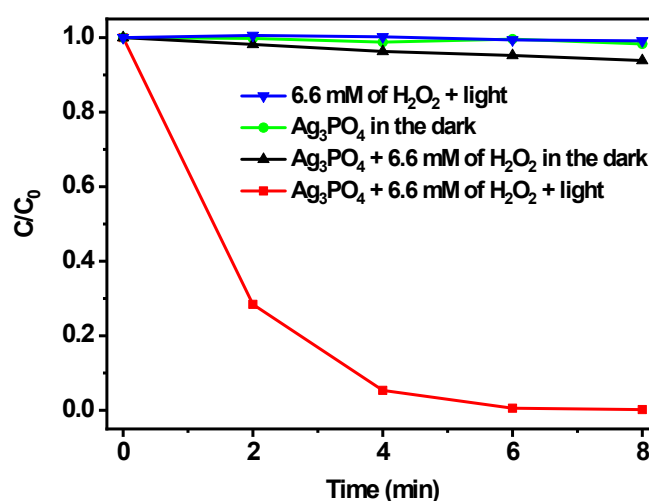

Figure S3. Temporal change in concentration of CV dye under different experimental conditions (shown in Figure labels) including illumination with blue LEDs in the presence of only  $\text{H}_2\text{O}_2$  or  $\text{Ag}_3\text{PO}_4 + \text{H}_2\text{O}_2$  as well under dark conditions (control experiments).

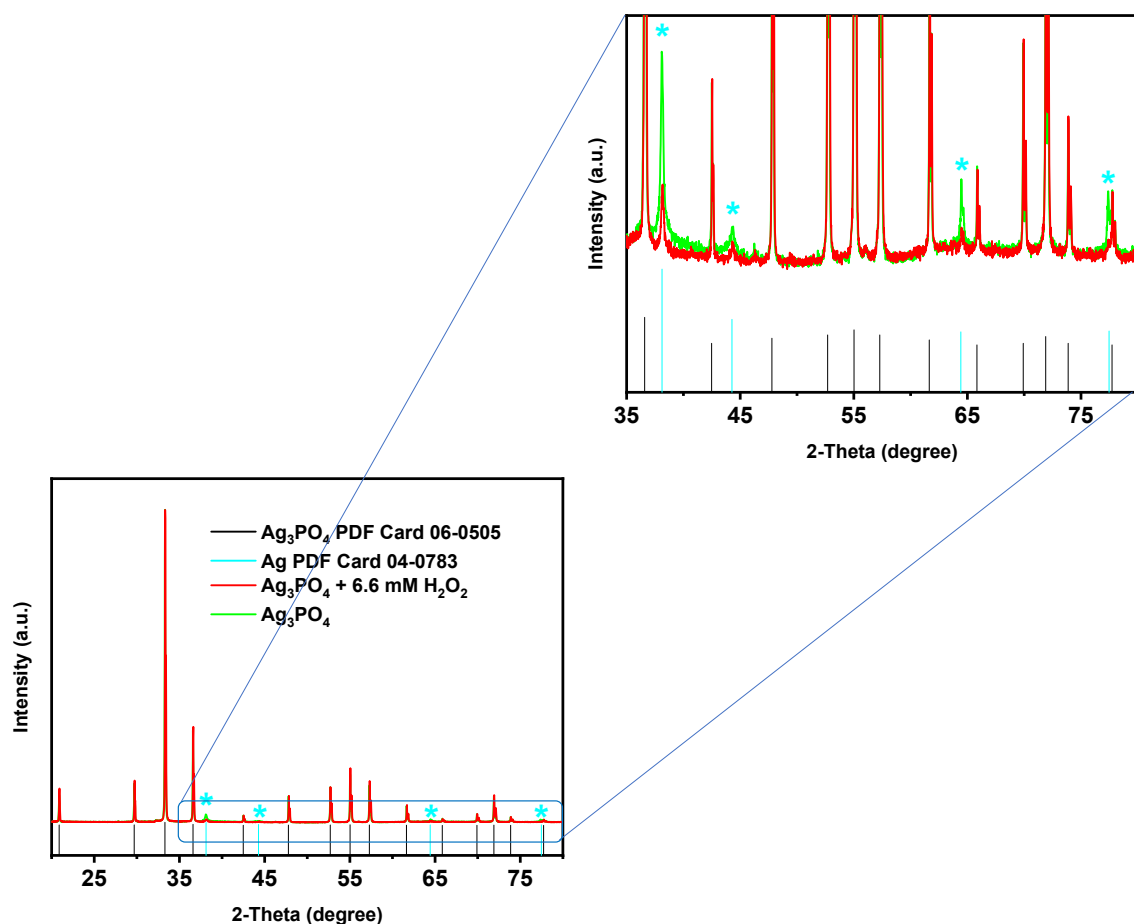

Figure S4. X-ray powder diffractograms of the recovered  $\text{Ag}_3\text{PO}_4$  samples compared to the diffraction patterns of pure  $\text{Ag}_3\text{PO}_4$  and Ag. The upper panel shows a zoom of the 2-theta region ( $35\text{--}80^\circ$ ) for better visualization of the peaks pertaining to metallic silver. The intensity of the characteristics diffraction peaks of  $\text{Ag}^0$  (marked with asterisks) are much lower for the binary  $\text{Ag}_3\text{PO}_4\text{--H}_2\text{O}_2$  system than the one single component  $\text{Ag}_3\text{PO}_4$  system, indicating the importance of  $\text{H}_2\text{O}_2$  for the stability recyclability of  $\text{Ag}_3\text{PO}_4$  during degradation tests.

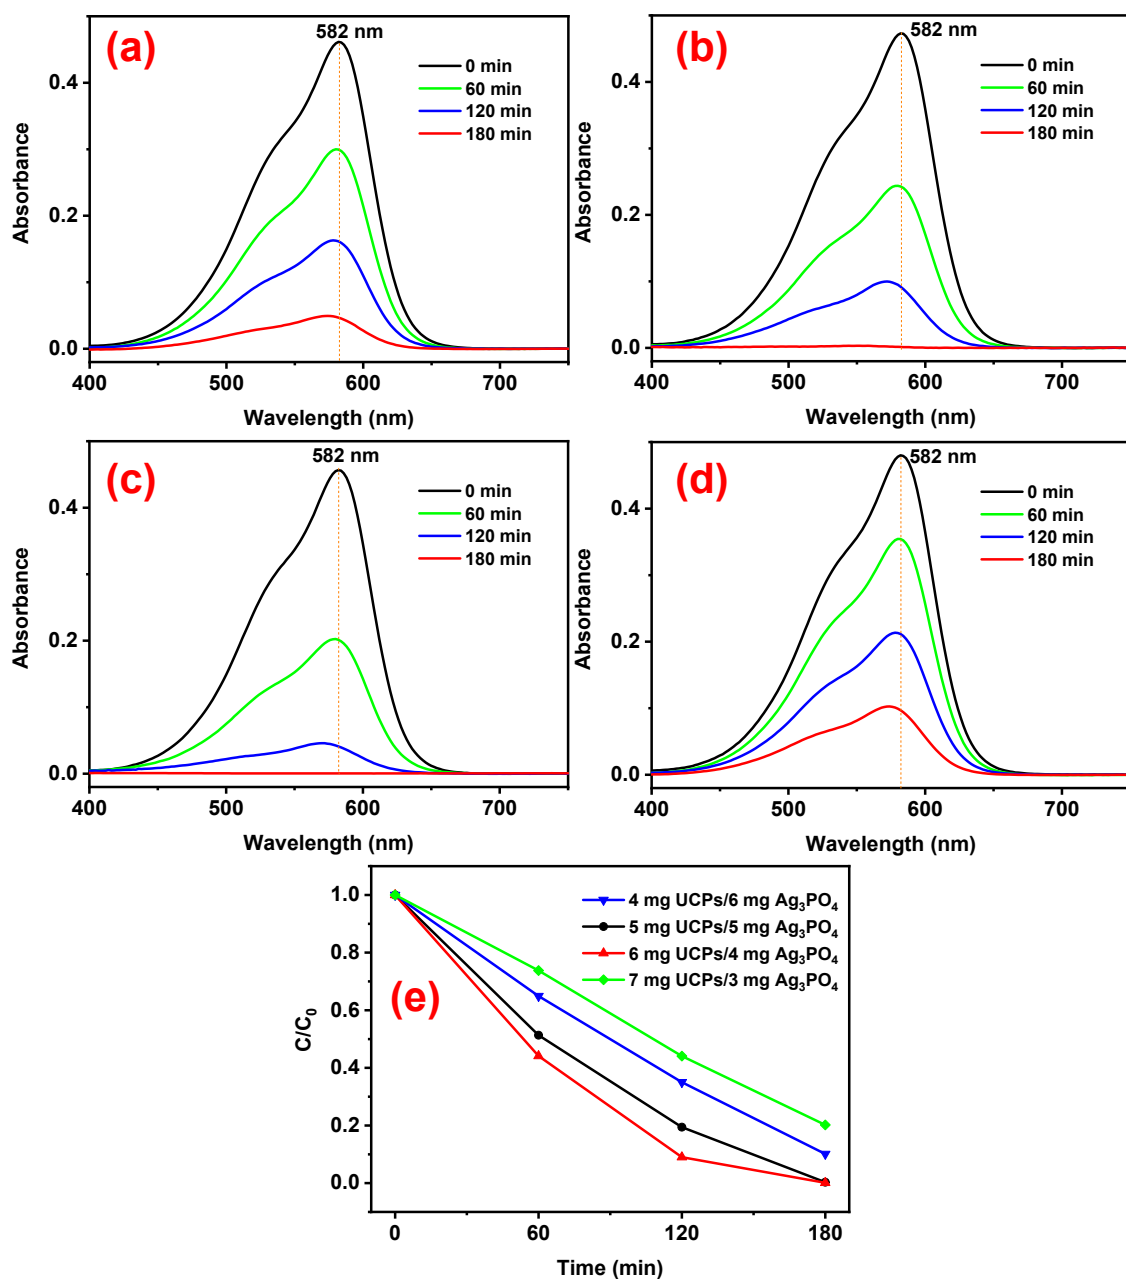

Figure S5. Temporal decrease in the absorbance of CV dye under 980 nm laser irradiation in the presence of different UCPS/Ag<sub>3</sub>PO<sub>4</sub> ratios (total amount of UCPS+Ag<sub>3</sub>PO<sub>4</sub> = 10 mg): (a) 4 mg/6 mg, (b) 5 mg/5 mg, (c) 6 mg/4 mg and (d) 7 mg/3 mg. (e) Comparison of the decrease in concentration of CV dye as a function of 980 nm laser irradiation time in the presence of the above ratios.
